# Supplementary material for: Using climate change scenarios to simulate mobility of metal contaminants in soils: the example of copper on a European scale
Source: Copernicus journal article supplement (doi:10.5194/egusphere-2023-2350), 2023-10-17
Supplement: Supplementary file 1 [file egusphere-2023-2350-supplement.pdf]

**Table S1: Percentage of grid cells calculated as low and high outliers for  $K_f$  and runoff for Cu, percentage of grid cells concerned by Cu leaching potential (LP) and by accumulation potential (AP), percentage of grid cells with high outlier for Cu runoff with leaching potential, and proportion of grid cells with low outlier for runoff with accumulation potential for each time period of each climate change scenario and each couple of land surface model x global circulation model.**

| LSM      | GCM   | Period            | $K_f$ low outlier | $K_f$ high outlier | Leaching | Accumulation | Runoff low outlier | Runoff high outlier | Leaching /<br>Runoff high outlier | Accumulation /<br>Runoff low outlier |
|----------|-------|-------------------|-------------------|--------------------|----------|--------------|--------------------|---------------------|-----------------------------------|--------------------------------------|
| ORCHIDEE | CM5a  | Historic          | 20.08             | 29.89              | 6.41     | 8.05         | 21.72              | 28.19               | 0.23                              | 0.37                                 |
|          |       | RCP 2.6 2051-2055 | 20.08             | 29.89              | 5.57     | 9.07         | 24.26              | 25.71               | 0.22                              | 0.37                                 |
|          |       | RCP 2.6 2091-2095 | 20.08             | 29.89              | 5.08     | 7.50         | 24.86              | 25.05               | 0.20                              | 0.30                                 |
|          |       | RCP 6.0 2051-2055 | 20.08             | 29.89              | 6.47     | 7.26         | 20.45              | 29.52               | 0.22                              | 0.36                                 |
|          |       | RCP 6.0 2091-2095 | 20.08             | 29.89              | 4.48     | 10.59        | 26.07              | 23.84               | 0.19                              | 0.41                                 |
|          | ESM2m | Historic          | 20.08             | 29.89              | 6.17     | 7.74         | 22.08              | 27.89               | 0.22                              | 0.35                                 |
|          |       | RCP 2.6 2051-2055 | 20.08             | 29.89              | 3.81     | 10.65        | 28.01              | 21.96               | 0.17                              | 0.38                                 |
|          |       | RCP 2.6 2091-2095 | 20.08             | 29.89              | 3.45     | 11.19        | 29.58              | 20.39               | 0.17                              | 0.38                                 |
|          |       | RCP 6.0 2051-2055 | 20.08             | 29.89              | 4.90     | 10.16        | 26.07              | 23.90               | 0.21                              | 0.39                                 |
|          |       | RCP 6.0 2091-2095 | 20.08             | 29.89              | 2.54     | 12.04        | 28.49              | 21.42               | 0.12                              | 0.42                                 |
| LPJmL    | CM5a  | Historic          | 20.08             | 29.89              | 6.65     | 5.51         | 20.15              | 29.82               | 0.22                              | 0.27                                 |
|          |       | RCP 2.6 2051-2055 | 20.08             | 29.89              | 6.53     | 7.80         | 22.69              | 27.28               | 0.24                              | 0.34                                 |
|          |       | RCP 2.6 2091-2095 | 20.08             | 29.89              | 5.69     | 5.69         | 21.78              | 28.19               | 0.20                              | 0.26                                 |
|          |       | RCP 6.0 2051-2055 | 20.08             | 29.89              | 6.35     | 5.81         | 21.54              | 28.43               | 0.22                              | 0.27                                 |
|          |       | RCP 6.0 2091-2095 | 20.08             | 29.89              | 5.38     | 9.20         | 25.47              | 24.50               | 0.22                              | 0.36                                 |
|          | ESM2m | Historic          | 20.08             | 29.89              | 6.35     | 5.69         | 21.11              | 28.86               | 0.22                              | 0.27                                 |
|          |       | RCP 2.6 2051-2055 | 20.08             | 29.89              | 5.51     | 6.72         | 24.02              | 25.95               | 0.21                              | 0.28                                 |
|          |       | RCP 2.6 2091-2095 | 20.08             | 29.89              | 5.26     | 8.35         | 25.53              | 24.44               | 0.22                              | 0.33                                 |
|          |       | RCP 6.0 2051-2055 | 20.08             | 29.89              | 6.05     | 7.99         | 23.59              | 26.38               | 0.23                              | 0.34                                 |
|          |       | RCP 6.0 2091-2095 | 20.08             | 29.89              | 4.11     | 9.98         | 26.62              | 23.35               | 0.18                              | 0.38                                 |

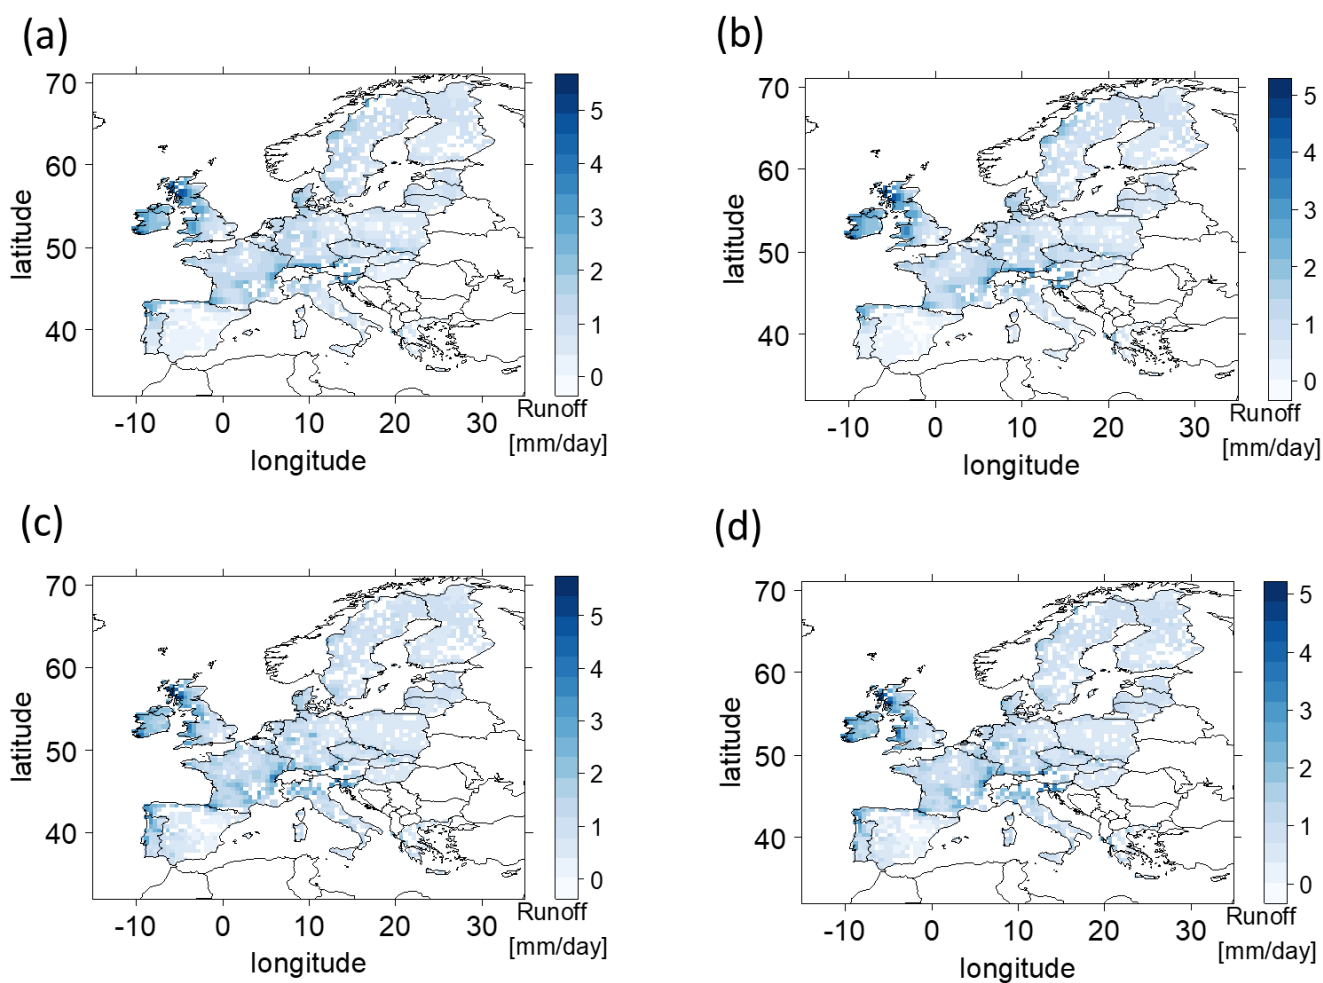

Fig S1: Mean of Cu runoffs for the 2001-2005 period for the different combinations of land surface schemes (ORCHIDEE in (a), (b) ; LPJmL in (c), (d)) and climate forcings (CM5a in (a), (c) and ESM2m in (b), (d)). White pixels correspond to pixel without OC measurement, then no  $K_f$  calcul and where thus exclude.

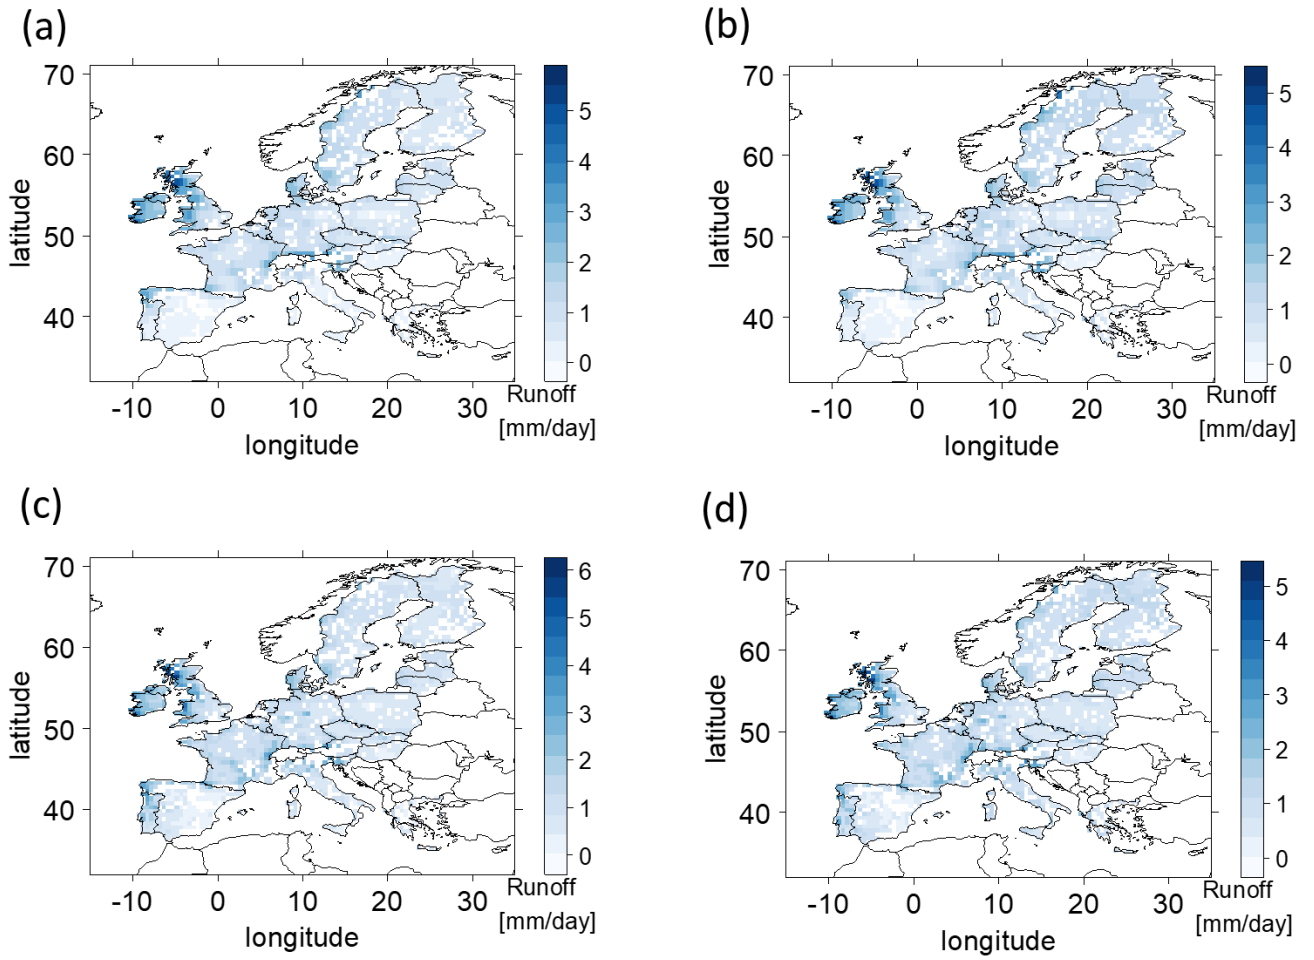

Fig S2: Mean of Cu runoffs for the RCP 2.6 and 2051-2055 period for the different combinations of land surface schemes (ORCHIDEE in (a), (b) ; LPJmL in (c), (d)) and climate forcings (CM5a in (a), (c) and ESM2m in (b), (d)). White pixels correspond to pixel without OC measurement, then no  $K_f$  calcul and where thus exclude.

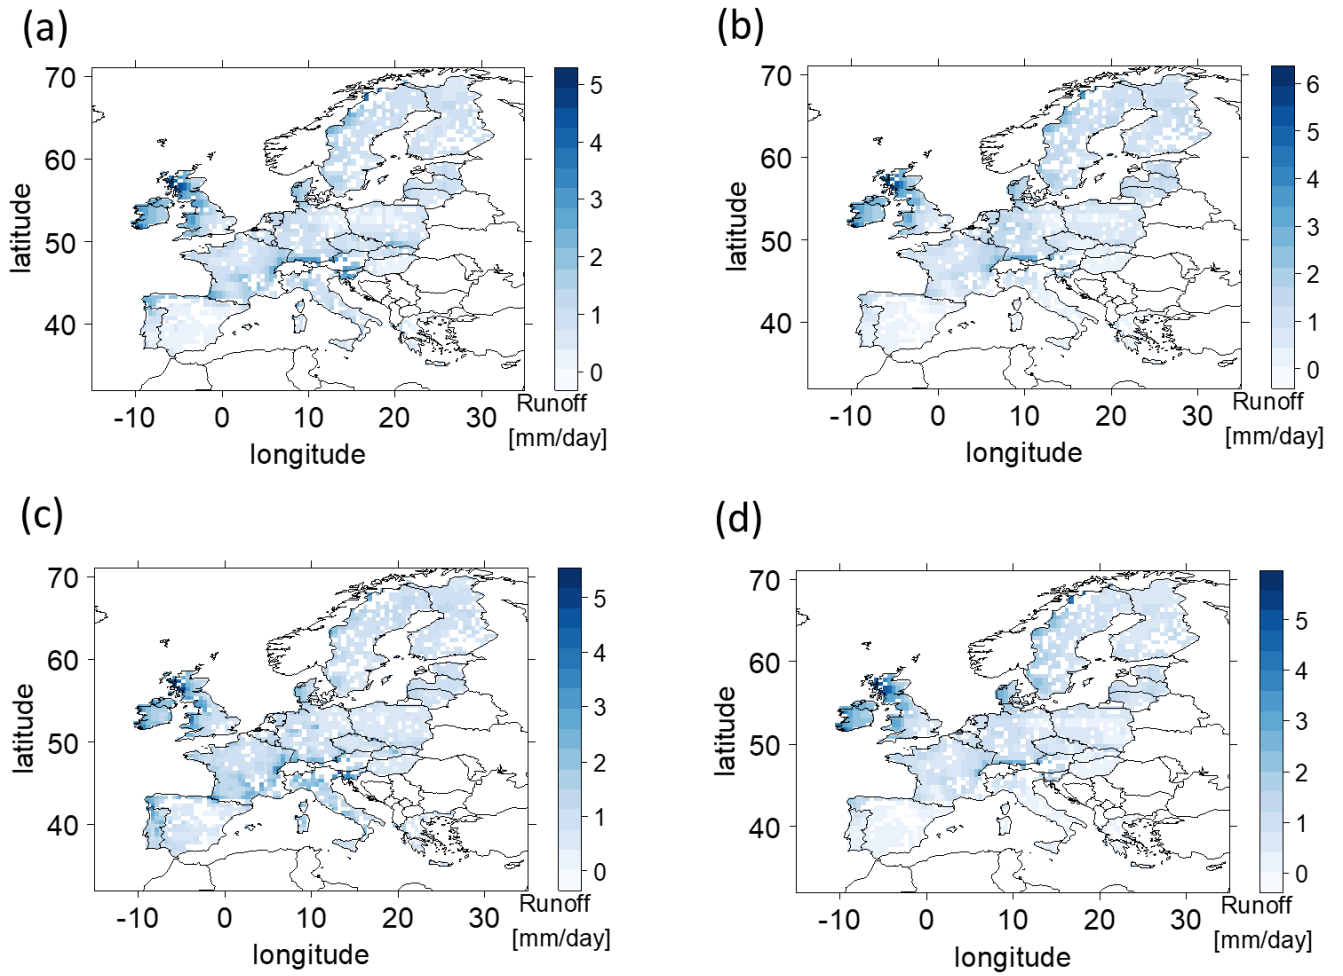

Fig S3: Mean of Cu runoffs for the RCP 2.6 and 2091-2095 period for the different combinations of land surface schemes (ORCHIDEE in (a), (b) ; LPJmL in (c), (d)) and climate forcings (CM5a in (a), (c) and ESM2m in (b), (d)). White pixels correspond to pixel without OC measurement, then no  $K_f$  calcul and where thus exclude.

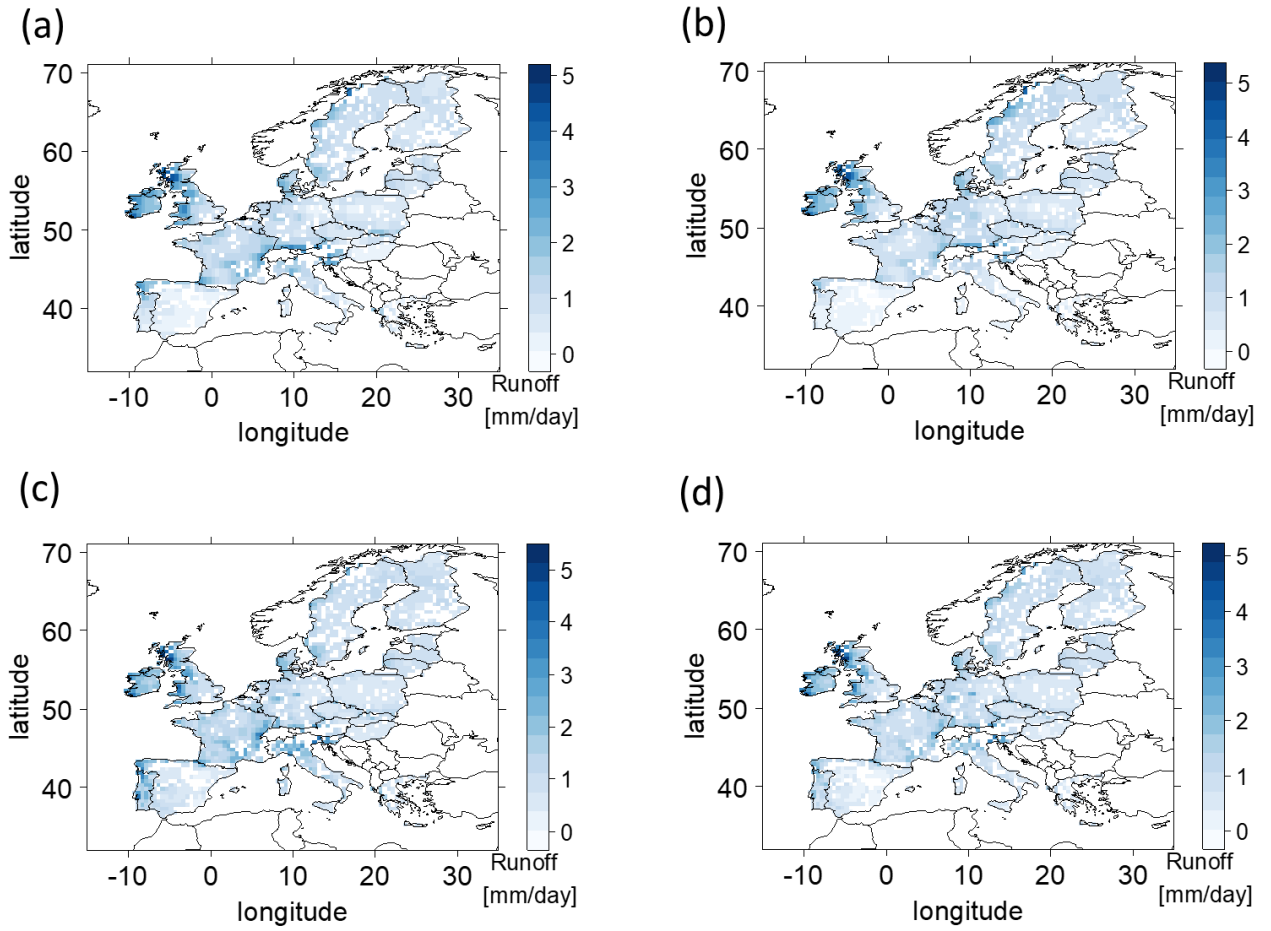

Fig S4: Mean of Cu runoffs for the RCP 6.0 and 2051-2055 period for the different combinations of land surface schemes (ORCHIDEE in (a), (b); LPJmL in (c), (d)) and climate forcings (CM5a in (a), (c) and ESM2m in (b), (d)). White pixels correspond to pixel without OC measurement, then no  $K_f$  calcul and where thus exclude.

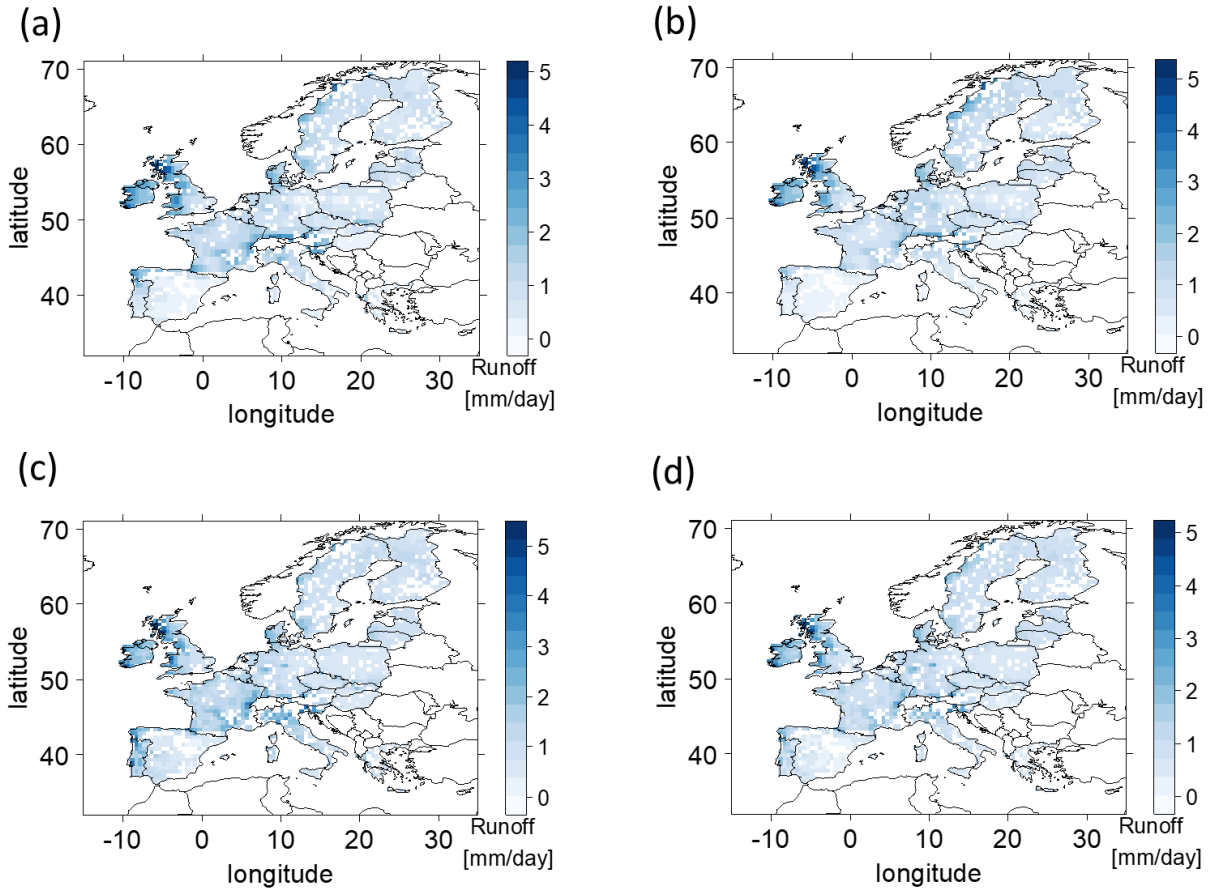

Fig S5: Mean of Cu runoffs for the RCP 6.0 and 2091-2095 period for the different combinations of land surface schemes (ORCHIDEE in (a), (b) ; LPJmL in (c), (d)) and climate forcings (CM5a in (a), (c) and ESM2m in (b), (d)). White pixels correspond to pixel without OC measurement, then no  $K_f$  calcul and where thus exclude.
